# Supplementary material for: Identification of region of difference and H37Rv-related deletion in Mycobacterium tuberculosis complex by structural variant detection and genome assembly
Source: Front Microbiol. 2022 Sep 8;13:984582. doi: 10.3389/fmicb.2022.984582 (PMC9493256; doi:10.3389/fmicb.2022.984582)
Supplement: Supplementary file 3 [file Table_3.XLSX]

## Sheet: Description
Supplementary Material 3
imformation	Details of the screened RDs and RvDs
RD11	Details of the strians with RD11 deletion

## Sheet: imformation
Details of the screened RDs and RvDs
RD	Reference	Specific lineage	Pos	End	Length	Repeats	IS elements	Sampled Dataset			Lineage	Retaining Strains			Genes
								Strains of specific lineage	Strains with RDs in specific lineage	Strains with deletion in RDs outside specific lineage		Strains of specific lineage	Strains with RDs in specific lineage	Strains with deletion in RDs outside specific lineage
RDcap_Spain1	1	M. caprae	29987	34321	4335	NR/NR	NI/NI	15	14		M. caprae	14	9 & 1 (extend deletion range)	M. bovis\4	[Rv0026, Rv0027, Rv0028, Rv0029, Rv0030, bioF2
RD301	2	M. orygis	34788	35208	421	NR/NR	NI/NI	13	13		M. orygis	25	25	M. bovis\26	[bioF2]
RD105ext	3	2.1	76156	84825	8670	NR/NR	NI/NI	15	15		2.1	9	9		[Rv0068, sdaA, glyA2, Rv0071, Rv0072, Rv0073, Rv0074, Rv0075
RD105	4	2.2	79570	83035	3466	CR/NR	NI/NI	181	181		2.2	2041	2025		[Rv0071, Rv0072, Rv0073, Rv0074
		8	84343	84792	450	NR/NR	NI/NI	2	2	FA\DD(2)	8	0	0		[Rv0075]
Non-IS6110 deletion in lineage 8	5	8	137516	138447	932	NR/NR	NI/NI	2	2	FA\UD(1)	8	0	0	Other\1	[gmhA, gmhB
RD701	6	6\9	149239	150979	1741	NR/NR	NI/NI	139\4	139\4	FA\DD(1), FA\UD(3)	6\9	0	0	Other\81	PE_PGRS2
RD302	2	4.3.4.2.1	164948	165736	789	NR/NR	NI/NI	15	15		4.3.4.2.1	151	150	4.3.4.2\1	[msrA, Rv0138
RD501	This study	4.3.3	171457	171778	322	NR/NR	NI/NI	14	14		4.3.3	377	361 & 1 (extend deletion range)	4.3\5	[Rv0145]
RDcap_Spain3	1	M. caprae	188885	190192	1308	NR/NR	NI/NI	15	14		M. caprae	14	9\1(long)	M. bovis\4	PE4
RD702	6	6\9	216796	218515	1720	NR/NR	NI/NI	139\4	139\4		6\9	0	0		[bglS, mymT
RD10	7	6\9\Animal	264755	266656	1902	NR/NR	NI/NI	139\4\73	139\4\73		6\9\Animal	0\0\203	192 & 9 (extend deletion range)		[Rv0221, echA1, Rv0223c
RD303	2	6\9	321665	322040	376	NR/NR	NI/NI	139\4	139\4		6\9	0	0		[narU]
RD502oryx	This study	M. orygis	365264	367097	1834	NR/CR	NI/NI	13	13	FA\DD(1)	M. orygis	25	25	M. bovis\26	[Rv0303, PPE5
RD502cap_1	This study	M. caprae	365448	365849	402	NR/NR	NI/NI	15	15	FA\DD(1)	M. caprae	14	12 & 2 (extend deletion range)	M. bovis\4	[Rv0303]
RD502cap_2	This study	M. caprae	366330	367169	840	CR/CR	NI/NI	15	15	FA\DD(1)	M. caprae	14	12 & 2 (extend deletion range)	M. bovis\4	[PPE5]
Non-IS6110 deletion in lineage 8	5	8	372162	377798	5637	CR/NR	NI/NI	2	2		8	0	0	Other\2	[PPE5, PPE6, Rv0306, Rv0307c, Rv0308
RD304	2	3.1.2.2	426729	428184	1456	CR/CR	NI/NI	17	17		3.1.2.2	33	31 & 2 (extend deletion range)		[PPE8]
RD115	4	4.3.3	453367	455972	2606	NR/NR	NI/NI	14	14		4.3.3	377	361 & 1 (extend deletion range)	4.3\5	[Rv0376c, Rv0377, Rv0378
RD305	2	M. caprae	472034	472533	500	NR/CR	NI/NI	15	14		M. caprae	14	9 & 1 (extend deletion range)	M. bovis\4	[ndhA]
		8	573269	573661	393	NR/NR	NI/NI	2	2		8	0	0		[Rv0484c]
RD122	4	4.5	669796	670964	1169	NR/NR	NI/NI	14	14	FA\UD(3)	4.5	136	134	4\1	Rv0576
Non-IS6110 deletion in lineage 8	5	8	692077	693426	1350	NR/NR	NI/NI	2	2	FA\DD(1)	8	0	0		[lprL, mce2F
RD503	This study	4.6.3	703611	703940	330	NR/R	NI/NI	15	15		4.6.3	0	0	4.6\8, Other\1	[vapC28, Rv0609A
RD504	This study	4.2.1.1	935428	935845	418	NR/NR	NI/NI	15	15		4.2.1.1	0	0	4.2.1\31	[lpqR, Rv0839
RD505	This study	1.2.2	1078523	1078814	292	NR/NR	NI/NI	25	25		1.2.2	0	0	1.2.1\7	[Rv0968, ctpV]
RD505ext	This study	1.2.2.1	1078523	1079743	1221	NR/NR	NI/NI	30	30		1.2.2.1	0	0	1.2.1\34	[Rv0968, ctpV]
RD506	This study	1.1.3.3	1161291	1162484	1194	NR/NR	NI/NI	12	12	FA\DD(1)	1.1.3.3	0	0	1.1.3\3, Other\4	PPE15
RD317	2	5	1313127	1313384	258	NR/NR	NI/NI	134	134		5	15	15	4.4.1\312, Other\3	[Rv1179c]
RD306	2	4.4.1	1313130	1313389	260	NR/NR	NI/NI	42	42		4.4.1	313	312	5\15, Other\3	[Rv1179c]
RD142	4	2.2.1.2	1332187	1335033	2847	NR/NR	NI/NI	13	13		2.2.1.2	10	9	2.2.1\2	[sigI, Rv1190, Rv1191, Rv1192
RD13	7	M. caprae\M. bovis\BCG	1402931	1405937	3007	NR/NR	NI/NI	15\15\14	15\15\14		M. caprae\M. bovis\BCG	165	133		[Rv1255c, cyp130, Rv1257c
RD711	6	5.1	1501715	1503655	1941	NR/NR	NI/NI	100	100	FA\DD(1)	5.1	0	0	5\14	[Rv1333, mec, cysO, cysM
RD761	8	4.3.2.1	1502787	1503886	1100	NR/NR	NI/NI	14	14	FA\DD(10)	4.3.2.1	235	231 & 1 (extend deletion range)		[mec, cysO, cysM
RD528	This study	Part of M. caprae	1694595	1732923	38329	NR/NR	NI/NI				Part of M. caprae
RD4	7	BCG\M. bovis	1696015	1708748	12734	NR/NR	NI/NI	15\14	15\14	FA\DD(23)	BCG\M. bovis	151	115		[Rv1506c, Rv1507c, Rv1507A, Rv1508c, Rv1508A, Rv1509, Rv1510, gmdA, epiA, Rv1513, Rv1514c, Rv1515c, Rv1516c
RD750	8	3	1710767	1711556	790	NR/NR	NI/NI	78	78	FA\DD(23)	3	2380	2362		[Rv1519, Rv1520
RD307	2	5.1.1\5.1.2\5.1.3	1714723	1719659	4937	NR/NR	NI/NI	16\22\16	16\22\16	FA\DD(14), FA\UD(1)	5.1.1\5.1.2\5.1.3	0	0	5\11	[mmpL12, Rv1523, Rv1524
RD147c	4	1	1718910	1721213	2304	NR/CR	NI/NI	261	261	FA\DD(13)	1	563	556		[Rv1524, wbbL2, Rv1526c
RD308	2	3.1.2.2	1727148	1728127	980	NR/NR	NI/NI	17	17	FA\DD(19)	3.1.2.2	33	33	3.1.2\5	[pks5]
RD742	6	6.1	1875726	1881506	5781	NR/NR	NI/NI	43	43		6.1	0	0		[pks7]
RD507	This study	6.2.3	1893461	1899609	6149	NR/NR	NI/NI	18	18	FA\UD(1)	6.2.3	0	0	Other\1	[cyp139, Rv1667c, Rv1669, Rv1670, Rv1671, Rv1672c, Rv1673c, Rv1674c
RD150	4	2.2.1.1	1896865	1899349	2485	NR/NR	NI/NI	15	15	FA\UD(2)	2.2.1.1	119	119		[Rv1671, Rv1672c, Rv1673c, Rv1674c
RD309	2	4.6.2.2	1897543	1901104	3562	NR/NR	NI/NI	13	13	FA\UD(1)	4.6.2.2	117	114		[Rv1672c, Rv1673c, Rv1674c, cmr, Rv1676
RD508	This study	1.1.3.2	1957605	1958882	1278	NR/NR	NI/NI	13	13	FA\UD(1)	1.1.3.2	0	0	1.1.3\16	gabD2
RD509	This study	4.4.2	1982888	1983317	430	R/R	NI/NI	15	15	FA\UD(2)	4.4.2	32	32	4.4\12, Other\12	[PPE24]
RD510	This study	2.1	2010608	2011435	828	NR/NR	NI/NI	15	15	FA\DD(1)	2.1	9	9		cyp144
Non-IS6110 deletion in lineage 8	5	4.3.1.1\4.4\8	2026163	2028425	2263	NR/NR	NI/NI	14\62\2	14\62\2	FA\DD(2), FA\UD(22)	4.3.1.1\4.4\8	0	0	4.3.1\5, Other\18	[PPE25, PE18, PPE26, PPE27
RDsur1	9	M. suricattae	2038671	2055880	17210	NR/NR	NI/NI	2	2		M. suricattae	2	2		lppT, PPE28, PPE29, PPE30, PE_PGRS32, Rv1804c, Rv1805c, PE20, PPE32, PPE33, Rv1810, mgtC, Rv1812c, Rv1813c
RDoryx1	1	M. orygis	2038718	2048278	9561	NR/NR	NI/NI	13	9		M. orygis	25	19 & 2 (extend deletion range)	M. bovis\14, Other\1	lppT, PPE28, PPE29, PPE30, PE_PGRS32, Rv1804c, Rv1805c, PE20
RD163(New)	10	2.2.2	2128378	2129581	1204	NR/NR	NI/NI	25	25	FA\DD(1), FA\UD(1)	2.2.2	54	53		[glnA3, Rv1879
RD167	4	1.2.1	2179567	2184680	5114	NR/NR	NI/NI	14	14	FA\DD(12)	1.2.1	133	133		Rv1927, Rv1928c, Rv1929c, Rv1930c, Rv1931c, tpx, fadE18
RD310	2	3.1.2.2	2197957	2198334	378	NR/NR	NI/NI	17	17		3.1.2.2	33	33		[lppG, Rv1947
RD7	7	6\9\Animal	2208006	2220724	12719	NR/NR	NI/NI	139\4\73	139\4\73	FA\UD(26)	6\9\Animal	0\0\203	0\0\191(& 1 with extend deletion range)	Other\10	[yrbE3A, yrbE3B, mce3A, mce3B, mce3C, mce3D, lprM, mce3F, Rv1972, Rv1973, Rv1974, Rv1975, Rv1976c, Rv1977
RD713	6	5	2219419	2223187	3769	NR/NR	NI/NI	134	134	FA\DD(19), FA\UD(3)	5	15	15	Other\35	Rv1977, Rv1978, Rv1979c
RD2_ER	This study	2.2.1 ER	2220926	2221269	344	NR/NR	NI/NI	16	16	FA\DD(5), FA\UD(6)	2.2.1 ER	0	0	2.2.1\177	[Rv1978]
RD2seal	11	M. pinnipedii	2220948	2222887	1940	NR/NR	NI/NI	4	4	FA\DD(2), FA\UD(4)	M. pinnipedii	3	2		[Rv1978, Rv1979c
RD2	12	BCG	2221064	2231850	10787	NR/NR	NI/NI	14	11		BCG	15	8	M. bovis\8	[Rv1978, Rv1979c, mpt64, nrdF1, vapC36, vapB36, PE_PGRS35, cfp21, RV1984a, Rv1985c, Rv1986, Rv1987, erm(37)
RD743	6	5	2235804	2239116	3313	NR/NR	NI/NI	134	134	FA\DD(1)	5	15	15		[ctpG, Rv1993c, cmtR, Rv1995, Rv1996
RD174	4	4.3.4	2237051	2240700	3650	NR/NR	NI/NI	41	41	FA\DD(1)	4.3.4	351	347	Other\2	[ctpG, Rv1993c, cmtR, Rv1995, Rv1996, ctpF
RD511	This study	2.2.2	2263779	2266164	2386	NR/NR	NI/NI	25	21(4 with different deletion range)	FA\UD(7)	2.2.2	54	28		[Rv2016, Rv2017, Rv2018, Rv2019
RD724	6	4.6.1	2265112	2266240	1129	NR/NR	NI/NI	33	33	FA\UD(11)	4.6.1	7	7		Rv2018, Rv2019
RD512	This study	M. caprae	2317175	2317722	548	NR/NR	NI/NI	15	14		M. caprae	14	9 & 1 (extend deletion range)	M. bovis\3	[cobN]
RD9	7	5\6\9\Animal	2330073	2332101	2029	CR/NR	NI/NI	134\139\4\73	134\139\4\73		5\6\9\Animal	15\0\0\203	15\0\0\192(& 9 with extend deletion range)		[cobL, Rv2073c, Rv2074, Rv2075c
RD178	4	4.1.2.1	2361910	2363680	1771	NR/NR	NI/NI	14	14		4.1.2.1	955	945\5 & 5 with extend deletion range	4.1.2\2	[helZ, Rv2102
RDsur2	9	M. suricattae	2534707	2534980	274	NR/NR	NI/NI	2	2	FA\UD(1)	M. suricattae	2	2		[Rv2261c]
RD181	4	2.2.1	2535432	2536141	710	CR/NR	NI/NI	156	156	FA\UD(1)	2.2.1	1987	1970 & 2 with extend deletion range		[Rv2261c, Rv2263
RD182	4	4.1.2.1	2545197	2551675	6479	NR/NR	NI/NI	14	14		4.1.2.1	955	945 & 1 with extend deletion range	4.1.2\2	[lppN, Rv2271, Rv2272, Rv2273, mazF8, mazE8, Rv2275, cyp121, Rv2277c, Rv2280
ND1	13	7	2562515	2563875	1361	NR/NR	NI/NI	14	14	FA\UD(1)	7	11	11		lppO, sseB
RD183	4	4.1.1.1	2585854	2588771	2918	NR/NR	NI/NI	15	15		4.1.1.1	163	163		[Rv2313c, Rv2314c, Rv2315c
RD5	7	M. caprae\M. bovis	2626070	2635030	8961	NR/CR	NI/NI	15\15	15\15	FA\UD(25)	M. caprae\M. bovis	14\151	116 & 9 with extend deletion range	BCG\15, Other\3	[esxO, esxP, Rv2348c, plcC, plcB, plcA, PPE38, PPE39
RD5bcg		BCG	2626070	2638441	12372	NR/CR	NI/NI	14	14	FA\UD(2)	BCG	0\15	15 (extend deletion range）	M. bovis\12	[esxO, esxP, Rv2348c, plcC, plcB, plcA, PPE38, PPE39
RD5sur	9	M. suricattae	2627068	2635576	8509	NR/CR	NI/CI	2	2	FA\UD(36)	M. suricattae	2	2	M. bovis\25, M. orygis\25, Other\168	plcC, plcB, plcA, PPE38, PPE39
RD5das	14	M. mungi\Dassie bacillus	2627068	2632922	5855	NR/NR	NI/NI	3	2	FA\UD(77)	M. mungi\Dassie bacillus	0	0	Other\67	plcC, plcB, plcA
RD5oryx	1	M. orygis	2629042	2639540	10499	NR/CR	NI/NI	13	13	FA\UD(4)	M. orygis	25	25	M. bovis\23	[plcB, plcA, PPE38, PPE39
RD513	This study	4.3.1	2646737	2647047	311	NR/NR	NI/NI	29	29		4.3.1	39	27		Rv2365c
RD193	4	4.1.1.3	2704307	2704806	500	NR/NR	NI/NI	26	26		4.1.1.3	452	445& 1 with extend deletion range	4.1.1\1	[Rv2406c, Rv2407
RD311	2	2.2.1 Modern	2729619	2729832	214	NR/NR	NI/NI	91	91		2.2.1 Modern	0	0	2.2\1, 2.2.1\1744, 2.2.1.1\118, 2.2.1.2\10	[Rv2434c]
RD312	2	5	2784161	2784568	408	NR/CR	NI/CI	134	134		5	15	15		[Rv2478c]
RD727	6	4.6.1\4.6.4	2902562	2904318	1757	NR/NR	NI/NI				4.6.1\4.6.4	7\0	7\0	4.6\13	[Rv2578c, dhaA
RD11	4	1.1\6\7\Animal 3\Animal 4	2969986	2980968	10983	NR/NR	NI/NI	192\139\14\44\13	192\139\14\44\13	FA\SD(41)	1.1\6\7\Animal 3\Animal 4	430\	425\11\184\3	Other\144	[valU, Rv2645, Rv2646, Rv2647, Rv2650c, Rv2651c, Rv2652c, Rv2653c, Rv2654c, Rv2655c, Rv2656c, Rv2657c, Rv2658c, Rv2659c, Rv2660c
RD313	2	1.1.1.8	3037026	3037298	273	NR/NR	NI/NI	16	16	FA\DD(1)	1.1.1.8	0	0	1.1.1\7	[fadE20]
		8	3170772	3171043	272	NR/NR	NI/NI	2	2		8	0	0		[Rv2859c]
RD213a	4	M. canetti	3288360	3290577	2218	NR/CR	CI/CI	8	8	FA\UD(1)	M. canetti	3	3	Other\12	Rv2943, Rv2943A, Rv2944
		8	3297693	3298348	656	NR/NR	NI/NI	2	2		8	0	0		[pks15, fadD22
RD514	This study	3.2	3376440	3379790	3351	NR/NR	NI/NI	13	13		3.2	0	0	3\82, Other\1	esxQ, PPE46, esCR, esxS, PPE47
RDVirs_das	14	Dassie bacillus\M. suricattae	3447249	3448431	1183	NR/NR	NI/NI	3\2	3\2		Dassie bacillus\M. suricattae	0\2	0\2		[Rv3081, virS
RD219	4	4.8	3448508	3451398	2891	NR/NR	NI/NI	56	56		4.8	818	805		[Rv3083, lipR, Rv3085
RD515	This study	4.8.3	3477168	3479881	2714	NR/NR	NI/NI	12	12		4.8.3	0	0	4.8\8	[Rv3108, moaA1, moaB1, moaC1, moaD1
RD12can	7	M. canetti	3479431	3491865	12435	NR/NR	NI/NI	8	8		M. canetti	3	3	Other\6	[moaC1, moaD1, Rv3113, Rv3114, Rv3115, moeB2, cysA3, Rv3118, moaE1, Rv3120, cyp141, Rv3122, Rv3123, moaR1, PPE49, Rv3126c
RD12oryx	1	M. orygis	3479670	3491252	11583	NR/NR	NI/NI	13	13		M. orygis	25	19 & 6 with extend deletion range	M. bovis\23	[moaC1, moaD1, Rv3113, Rv3114, Rv3115, moeB2, cysA3, Rv3118, moaE1, Rv3120, cyp141, Rv3122, Rv3123, moaR1, PPE49
RD12	7	M. caprae\M. bovis\BCG	3484740	3487514	2775	NR/NR	NI/NI	15\15\14	15\15\14	FA\UD(1)	M. caprae\M. bovis\BCG	165	133		[cysA3, Rv3118, moaE1, Rv3120, cyp141
RD516_L1	This study	1	3501224	3501723	500	NR/NR	NI/NI	261	261		1	563	559	Other\2	PPE50
RD516_L2.1	This study	2.1	3501321	3501664	344	NR/NR	NI/NI	15	15		2.1	9	9		[PPE50]
RD516_L4.1	This study	4.1	3501335	3501664	330	NR/NR	NI/NI	129	129		4.1	1785	1775	Other\9	[PPE50]
RD516_L3	This study	3	3501534	3501667	134	NR/NR	NI/NI	78	78		3	2380	2378 & 1 with extend deletion range		[PPE50]
RD517	This study	3.1.1	3508769	3509615	847	NR/NR	NI/NI	14	14	FA\DD(2), FA\UD(2)	3.1.1	231	212		[fadB4, Rv3142c
MiD2	15	M. orygis	3554067	3555365	1299	CR/NR	I/NI	13	13	FA\DD(1), FA\UD(11)	M. orygis	25	25	M. bovis\26, Other\8	Rv3188, Rv3189
RD314	2	2.1	3606558	3607840	1283	NR/NR	NI/NI	15	15		2.1	9	9		[desA3, Rv3230c
RD518	This study	4.6.2.2	3740034	3757612	17579	CR/CR	NI/NI	13	13	FA\DD(1), FA\UD(3)	4.6.2.2	117	108	Other\3	[PE_PGRS50, Rv3346c, PPE55, Rv3348, Rv3349c, PPE56
RD519	This study	6.3	3740910	3744353	3444	R/NR	NI/NI	45	45	FA\DD(9), FA\UD(1)	6.3	0	0		[PE_PGRS50, Rv3346c, PPE55
MID3	15	M. microti\M. pinnipedii	3741143	3755776	14634	CR/NR	NI/NI	6\4	6\4	FA\DD(1), FA\UD(3)	M. microti\M. pinnipedii	8\3	2(& 6 with extend deletion range)\2		[PE_PGRS50, Rv3346c, PPE55, Rv3348, Rv3349c
RDrio	16	4.3.4	3743393	3769550	26158	CR/R	NI/NI	41	41	FA\SD(1), FA\UD(1)	4.3.4	351	336 & 10 with extend deletion range	4.3\1, Other\15	[Rv3346c, PPE55, Rv3348, Rv3349c, PPE56, Rv3351c, Rv3352c, Rv3353c, Rv3354, Rv3355c
RD520	This study	5	3747378	3748437	1060	NR/CR	NI/NI	134	134	FA\DD(12), FA\UD(4)	5	15	15		[PPE55]
		8	3758921	3764261	5341	CR/CR	NI/NI	2	2	FA\DD(2), FA\UD(7)	8	0	0	Other\1	[PPE56]
RD521	This study	4.6.2.2	3785172	3785817	646	NR/NR	NI/NI	13	13		4.6.2.2	117	114		[Rv3371]
RD522	This study	3.1.2.2	3796911	3800491	3581	NR/NR	NI/I	17	17	FA\DD(2)	3.1.2.2	33	33		[Rv3382c, idsB, vapC46, vapB46, Rv3386
RD523	This study	6.2.1\6.2.2	3866186	3868230	2045	NR/NR	NI/NI	33	33		6.2.1\6.2.2	0	0		[eccC4]
RD315	2	M. orygis	3868987	3869341	355	NR/NR	NI/NI	13	13	FA\UD(1)	M. orygis	25	25	M. bovis\26	[eccD4]
ND2	13	7	3883906	3887200	3295	R/NR	NI/NI	14	14(differentdeletion range)		7	11	0		[Rv3466, Rv3467, Rv3468c, mhpE, ilvB2
N-RD17	17	BCG\M. bovis	3897073	3897785	713	NR/NR	NI/NI	14\15	14\15	FA\DD(1)	BCG\M. bovis	151	15\101(& 4 with extend deletion range)		[Rv3479]
RD726	8	4.6.2	3904958	3906706	1749	NR/NR	NI/NI	26	26	FA\DD(3)	4.6.2	142	115	Other\5	[Rv3485c, Rv3486, lipF
RD316	2	3	3952925	3954222	1298	NR/NR	NI/NI	78	77		3	2380	2361 & 1 with extend deletion range		[echA19, Rv3517
RDpin	1	M. pinnipedii	3967678	3968974	1297	NR/NR	NI/NI	4	4		M. pinnipedii	3	2		[Rv3530c, Rv3531c
RD524	This study	3.2	3998973	3999266	294	CR/CR	NI/NI	13	13		3.2	0	0	3\67	[PPE64]
RD8	7	6\9\Animal	4056840	4062733	5894	NR/NR	NI/NI	139\4\73	139\4\73	FA\DD(1)	6\9\Animal	0\0\203	0\0\192(& 11 with extend deletion range)	Other\7	ephA, Rv3618, esxV, esxW, PPE65, PE32, lpqG
RD236a	4	1.1.1 (except 1.1.1.2)	4056945	4058396	1452	NR/NR	NI/NI	109	109	FA\DD(13)	1.1.1 (except 1.1.1.2)	0\0	0\0	1.1.1\30, 1.1.1.1\16	ephA
RD239	4	1	4092080	4092921	842	NR/NR	NI/NI	261	261	FA\DD(1)	1	263	560		[Rv3651]
N-RD25das	14	M. mungi\Dassie bacillus\M. suricattae	4188293	4190238	1946	NR/NR	NI/NI	1\3\2	1\3\2		M. mungi\Dassie bacillus\M. suricattae	0\0\2	0\0\2		[Rv3737, PPE66
N-RD25_tbB	18	2.1	4189241	4190190	950	NR/NR	NI/NI	15	15		2.1	9	9	Other\1	[Rv3737, PPE66
N-RD25_tbA	18	3.1	4189257	4190366	1110	NR/NR	NI/NI	65	65		3.1	467	458	2.1\8, 3\1774	[Rv3737, PPE66, PPE67
N-RD25bov/cap	17	M. caprae\M. bovis\BCG	4189594	4190759	1166	NR/NR	NI/NI	15\15\14	15\15\14		M. caprae\M. bovis\BCG	165	133		[PPE66, PPE67
RDcap_Spain6	1	M. caprae	4194728	4196290	1563	NR/NR	NI/NI	15	14		M. caprae	14	9 & 1 with extend deletion range	M. bovis\4	[ctpJ, nmtR, Rv3745c, PE34
RD247b	4	4.8.2	4212914	4215053	2140	NR/CR	NI/NI	15	15	FA\DD(1)	4.8.2	0	0	4.8\289	[Rv3766, Rv3767c, Rv3768, Rv3769
RD525	This study	1.1.3.1	4338430	4338738	309	NR/NR	NI/NI	13	13		1.1.3.1	0	0	1.1.3\50	[whiB6]
RD1mic	15	M. microti	4340418	4354536	14119	NR/NR	NI/NI	6	6		M. microti	8	3 & 3 with extend deletion range	Other\1	[espE, espF, espG1, espH, eccA1, eccB1, eccCa1, eccCb1, PE35, PPE68, esxB, esxA, espI
RD1	7	BCG	4350266	4359722	9457	NR/NR	NI/NI	14	14	FA\DD(1)	BCG	15	15	M. bovis\8	[eccCb1, PE35, PPE68, esxB, esxA, espI, eccD1, espJ, espK
RD1mon	19	M. mungi	4352093	4353868	1776	CR/NR	NI/NI	1	1	FA\DD(1)	M. mungi	0	0		[PPE68, esxB, esxA, espI
RD1das	14	Dassie bacillus\M. suricattae	4352301	4356431	4131	CR/NR	NI/NI	3\2	3\2	FA\DD(1)	Dassie bacillus\M. suricattae	0\2	0\2	Other\1	[esxB, esxA, espI, eccD1
RD526	This study	4.8.1	4365044	4365793	750	NR/NR	NI/NI	15	15		4.8.1	0	0	4.8\32	[eccA2]
RDcap_Spain7	1	M. caprae	4368140	4376107	7968	NR/NR	NI/NI	15	14		M. caprae	14	9 & 1 with extend deletion range	M. bovis\1	[eccE2, mycP2, eccD2, Rv3888c, espG2, esxC, esxD, PPE69, PE36
RD252	4	4.1.1.1	4370423	4373233	2811	NR/NR	NI/NI	15	15	FA\UD(1)	4.1.1.1	163	163		[eccD2, Rv3888c, espG2
		4.6.2.1	4374406	4376300	1895	NR/NR	NI/NI	2	2	FA\DD(1), FA\UD(2)	4.6.2.1	0	0		PPE69, PE36, eccC2
DS70	20	1.1.1.9	4386640	4388340	1701	NR/NR	NI/NI	17	17	FA\DD(1)	1.1.1.9	0	0	1.1.1\12	[Rv3901c, Rv3902c, Rv3903c
RD527	This study	1.1.1.9	4388667	4389908	1242	NR/NR	NI/NI	17	17	FA\DD(1)	1.1.1.9	0	0	1.1.1\10, Other\1	[Rv3903c]
RvD533	This study	4.7\4.8\4.9	742634		533			5\46\29	5\46\29		4.7\4.8\4.9	121\818\129	121\810\128	4\3, Other\8
TbD1	21	2\3\4	1761789		2153			196\78\586	196\78\586		2\3\4	2051\2380\4991	2049\2377\4987	Other\9
RvD4496	This study	4\6\9\Animal	2219417		4496			586\139\4\73	586\139\4\73		4\6\9\Animal	4991\0\0\203	4969\0\0\203	Other\22
RvD5000	22	4.8\4.9	2268721		5000			46\29	46\29		4.8\4.9	818\129	807\128	Other\48
cobF region	5	except 8 and M. canetti	Rv0943c	Rv0944	4.4 kb			1485	1485		except 8 and M. canetti	10215	10215
RvD2	22	2\3.1\4.3.1.1\4.3.3\4.3.4\4.4.1\4.6.2.2\4.6.3\4.7\4.8.1\5.1.5\8\M.orygis and other lineage (proportion<0.5)	1987 kb		6.8 kb						2\3.1\4.3.1.1\4.3.3\4.3.4\4.4.1\4.6.2.2\4.6.3\4.7\4.8.1\5.1.5\8\M.orygis and other lineage (proportion<0.5)
RvD5	23	Part of 4.9	3711 kb		3.8 kb						Part of 4.9
The name of RDs without repeat sequence or IS elements found at either ends were tagged with blue color
Strains with deletion in RDs outside specific lineage: this column shows the absence of RDs or RvDs detected in strains outside the specific lineage (in sampleed dataset or retaining strains)	The number of strains is indicated in parentheses	FA = False Absence, we assume that this deletion should not occur in strains outside the specific lineage, so the deletion outside the specific lineage is taged 'FA'
		DD = Detected deletion but differ in range
		DD = Undetected deletion with unknown range
		SD = Deletion with the same range as RD
		Other = Other lineages that were not parent lineage (lineages with overlapping deletions were also excluded because of the possibility of misdetection in the advanced sequencing coverage)
		The presence of an actual lineage name means that deletions were detected within the lineage (parent lineage or lineages with overlapping deletions； The M. bovis was retained because we believe it may have been mislabeled)
Repeats : this column shows whether repeats are present or adjacent to RDs	Two sides of the '/' indicate the two breakpoints before and after	NR = The breakpoint is not locate nerby repeat sequence
		CR = The breakpoint is close to repeat sequence (with in 200 bp)
		R = The breakpoint is locate in repeat sequence
IS elements : this column shows whether IS elements are present or adjacent to RDs	Two sides of the '/' indicate the two breakpoints before and after	NI = The breakpoint is not locate nerby IS element
		CI = The breakpoint is close to IS element (with in 200 bp)
		I = The breakpoint is locate in IS element
Reference
1	Mostowy S, Inwald J, Gordon S, Martin C, Warren R, Kremer K, Cousins D, Behr MA. J Bacteriol. Revisiting the evolution of Mycobacterium bovis. 2005 Sep;187(18):6386-95. doi: 10.1128/JB.187.18.6386-6395.2005.
2	Bespiatykh, D. , Bespyatykh, J. , Mokrousov, I. , & Shitikov, E. . (2021). A comprehensive map of mycobacterium tuberculosis complex regions of difference. mSphere, 6(4).
3	Shitikov E, Kolchenko S, Mokrousov I, Bespyatykh J, Ischenko D, Ilina E, Govorun V. Evolutionary pathway analysis and unified classification of East Asian lineage of Mycobacterium tuberculosis. Sci Rep. 2017 Aug 23;7(1):9227. doi: 10.1038/s41598-017-10018-5.
4	Tsolaki AG, Hirsh AE, DeRiemer K, Enciso JA, Wong MZ, Hannan M, Goguet de la Salmoniere YO, Aman K, Kato-Maeda M, Small PM. Functional and evolutionary genomics of Mycobacterium tuberculosis: insights from genomic deletions in 100 strains. Proc Natl Acad Sci U S A. 2004 Apr 6;101(14):4865-70. doi: 10.1073/pnas.0305634101.
5	Ngabonziza, Jcs , et al. "A sister lineage of the Mycobacterium tuberculosis complex discovered in the African Great Lakes region." Nature Communications 11(2020).
6	Mostowy S, Onipede A, Gagneux S, Niemann S, Kremer K, Desmond EP, Kato-Maeda M, Behr M. Genomic analysis distinguishes Mycobacterium africanum. J Clin Microbiol. 2004 Aug;42(8):3594-9. doi: 10.1128/JCM.42.8.3594-3599.2004.
7	Gordon SV, Brosch R, Billault A, Garnier T, Eiglmeier K, Cole ST. Identification of variable regions in the genomes of tubercle bacilli using bacterial artificial chromosome arrays. Mol Microbiol. 1999 May;32(3):643-55. doi: 10.1046/j.1365-2958.1999.01383.x.
8	Gagneux S, DeRiemer K, Van T, Kato-Maeda M, de Jong BC, Narayanan S, Nicol M, Niemann S, Kremer K, Gutierrez MC, Hilty M, Hopewell PC, Small PM. Variable host-pathogen compatibility in Mycobacterium tuberculosis. Proc Natl Acad Sci U S A. 2006 Feb 21;103(8):2869-73. doi: 10.1073/pnas.0511240103.
9	Dippenaar A, Parsons SDC, Sampson SL, van der Merwe RG, Drewe JA, Abdallah AM, Siame KK, Gey van Pittius NC, van Helden PD, Pain A, Warren RM. Whole genome sequence analysis of Mycobacterium suricattae. Tuberculosis (Edinb). 2015 Dec;95(6):682-688. doi: 10.1016/j.tube.2015.10.001.
10	Schürch AC, Kremer K, Hendriks AC, Freyee B, McEvoy CR, van Crevel R, Boeree MJ, van Helden P, Warren RM, Siezen RJ, van Soolingen D. SNP/RD typing of Mycobacterium tuberculosis Beijing strains reveals local and worldwide disseminated clonal complexes. PLoS One. 2011;6(12):e28365. doi: 10.1371/journal.pone.0028365.
11	Marmiesse M, Brodin P, Buchrieser C, Gutierrez C, Simoes N, Vincent V, Glaser P, Cole ST, Brosch R. Macro-array and bioinformatic analyses reveal mycobacterial 'core' genes, variation in the ESAT-6 gene family and new phylogenetic markers for the Mycobacterium tuberculosis complex. Microbiology (Reading). 2004 Feb;150(Pt 2):483-496. doi: 10.1099/mic.0.26662-0.
12	Mahairas GG, Sabo PJ, Hickey MJ, Singh DC, Stover CK. Molecular analysis of genetic differences between Mycobacterium bovis BCG and virulent M. bovis. J Bacteriol. 1996 Mar;178(5):1274-82. doi: 10.1128/jb.178.5.1274-1282.1996.
13	Nebenzahl-Guimaraes H, Yimer SA, Holm-Hansen C, de Beer J, Brosch R, van Soolingen D. Genomic characterization of Mycobacterium tuberculosis lineage 7 and a proposed name: 'Aethiops vetus'. Microb Genom. 2016 Jun 24;2(6):e000063. doi: 10.1099/mgen.0.000063
14	Mostowy S, Cousins D, Behr MA. Genomic interrogation of the dassie bacillus reveals it as a unique RD1 mutant within the Mycobacterium tuberculosis complex. J Bacteriol. 2004 Jan;186(1):104-9. doi: 10.1128/jb.186.1.104-109.2003.
15	Brodin P, Eiglmeier K, Marmiesse M, Billault A, Garnier T, Niemann S, Cole ST, Brosch R. Bacterial artificial chromosome-based comparative genomic analysis identifies Mycobacterium microti as a natural ESAT-6 deletion mutant. Infect Immun. 2002 Oct;70(10):5568-78. doi: 10.1128/iai.70.10.5568-5578.2002.
16	Lazzarini LC, Huard RC, Boechat NL, Gomes HM, Oelemann MC, Kurepina N, Shashkina E, Mello FC, Gibson AL, Virginio MJ, Marsico AG, Butler WR, Kreiswirth BN, Suffys PN, Lapa E Silva JR, Ho JL. Discovery of a novel Mycobacterium tuberculosis lineage that is a major cause of tuberculosis in Rio de Janeiro, Brazil. J Clin Microbiol. 2007 Dec;45(12):3891-902. doi: 10.1128/JCM.01394-07.
17	Salamon H, Kato-Maeda M, Small PM, Drenkow J, Gingeras TR. Detection of deleted genomic DNA using a semiautomated computational analysis of GeneChip data. Genome Res. 2000 Dec;10(12):2044-54. doi: 10.1101/gr.gr-1529r.
18	Huard RC, Fabre M, de Haas P, Lazzarini LC, van Soolingen D, Cousins D, Ho JL. Novel genetic polymorphisms that further delineate the phylogeny of the Mycobacterium tuberculosis complex. J Bacteriol. 2006 Jun;188(12):4271-87. doi: 10.1128/JB.01783-05.
19	Alexander KA, Laver PN, Michel AL, Williams M, van Helden PD, Warren RM, Gey van Pittius NC. Novel Mycobacterium tuberculosis complex pathogen, M. mungi. Emerg Infect Dis. 2010 Aug;16(8):1296-9. doi: 10.3201/eid1608.100314.
20	Kato-Maeda M, Rhee JT, Gingeras TR, Salamon H, Drenkow J, Smittipat N, Small PM. Comparing genomes within the species Mycobacterium tuberculosis. Genome Res. 2001 Apr;11(4):547-54. doi: 10.1101/gr.166401.
21	Brosch, R. , Gordon, S. V. , Marmiesse, M. , Brodin, P. , Buchrieser, C. , & Eiglmeier, K. , et al. (2002). A new evolutionary scenario for the mycobacterium tuberculosis complex. Proceedings of the National Academy of Sciences, 99(6), 3684-3689.
22	Gordon, S. V. . (2010). Identification of variable regions in the genomes of tubercle bacilli using bacterial artificial chromosome arrays. Molecular Microbiology, 32.
23	Fang, Doig, Kenna, DT, Smittipat, & Palittapongarnpim, et al. (1999). Is6110-mediated deletions of wild-type chromosomes of mycobacterium tuberculosis. J BACTERIOL, 1999,181(3)(-), 1014-1020.

## Sheet: RD11
Details of the strians with RD11 deletion
lineage	Total strains	Strians with RD11 deletion
1.1	192	192
6	139	139
7	14	14
Animal 3	44	44
Animal 4	13	13
3.1.2.1	18	2	Total: 41
4.1	8 (129)	1
4.1.1.1	15	1
4.2.2	14	4
4.6.1.1	15	2
4.6.1.2	15	1
4.6.4	8	2
4.6.5	14	3
5.1.1	16	1
5.1.4	22	14
9	4	1
M. mungi	1	1
M. canetti	8	8
Number of strains in parentheses including strains belong to sublineages
